# Supplementary material for: Atomic structure of the Epstein-Barr virus portal
Source: Nat Commun. 2019 Aug 29;10:3891. doi: 10.1038/s41467-019-11706-8 (PMC6715670; doi:10.1038/s41467-019-11706-8)
Supplement: Supplementary file 1 — Supplementary Information [file 41467_2019_11706_MOESM1_ESM.pdf]

## **SUPPLEMENTARY INFORMATION**

### **Atomic structure of the Epstein-Barr virus portal**

**Machón et al.**

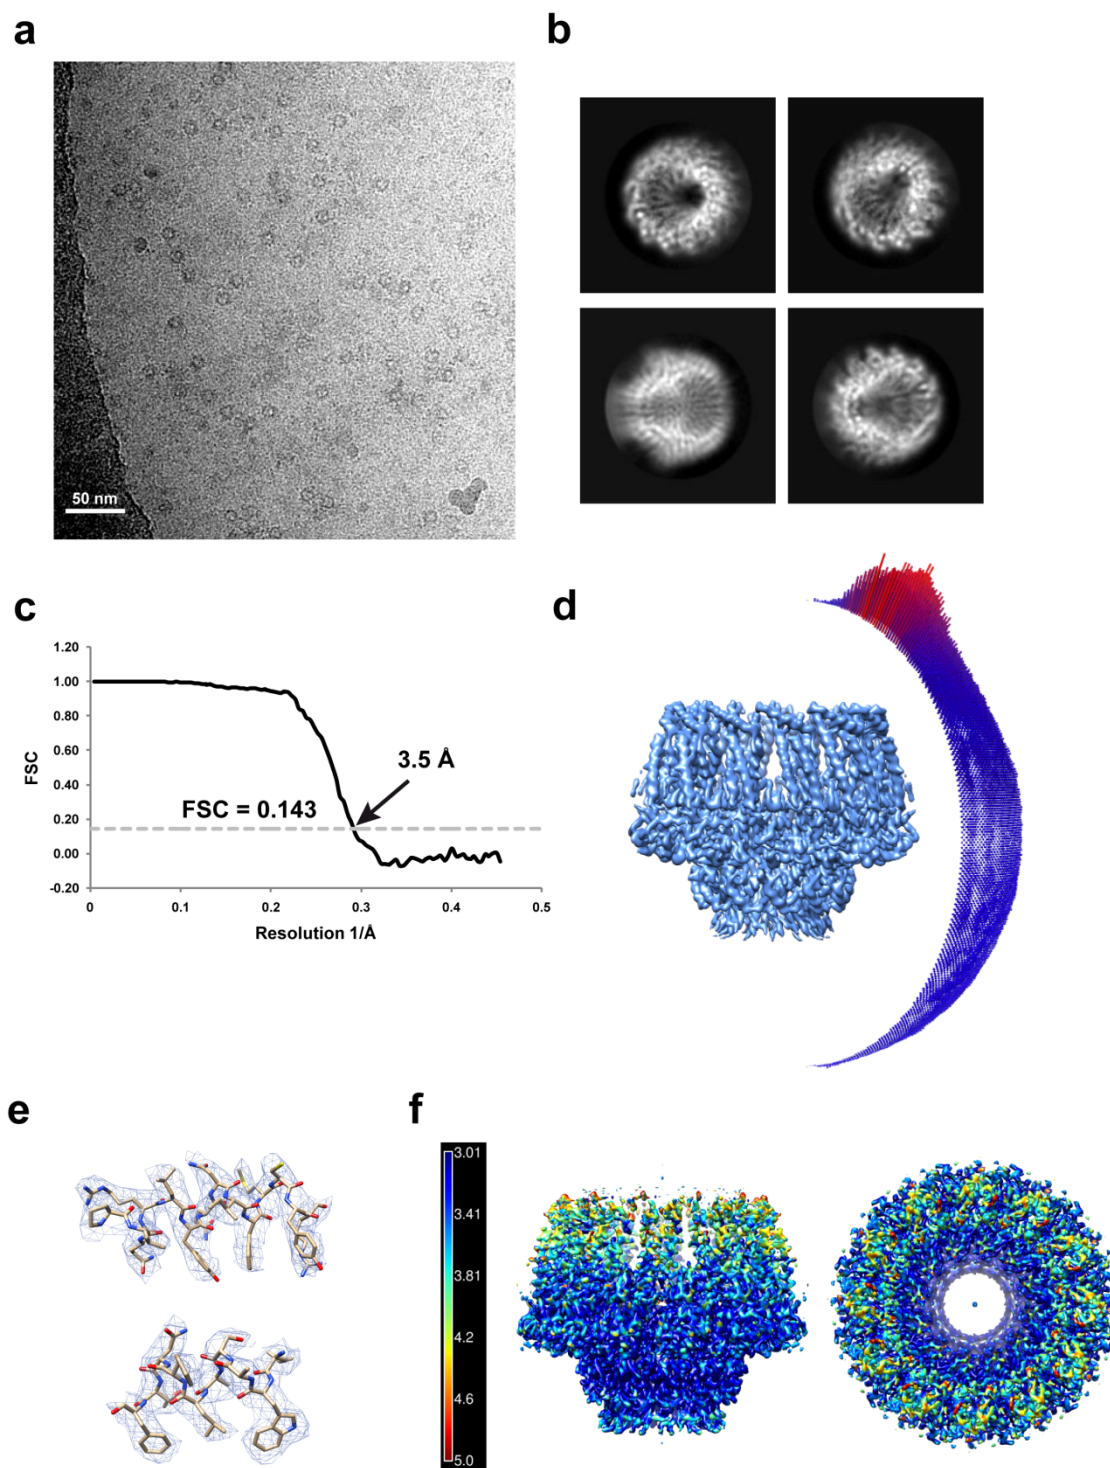

**Supplementary Fig. 1.** **a.** Representative cryo-EM micrograph of the EBV portal sample. The scale bar represents 50 nm. **b.** RELION 2D averages used for model building, showing end-on and side-views. **c.** RELION resolution FSC curve. The FSC= 0.143 gold-standard cutoff criterion was used for determining the final resolution of the model (3.5 Å). **d.** RELION 3D reconstruction of EBV portal dodecamer model showing the angular distribution plot of the particles. **e.** Extraction of the density from the 3D reconstruction showing the placement of the side chains in two different areas. **f.** MonoRes local resolution map showing a side view (left) and an end-on view (right). The resolution plot ranges from 3.01-5.0 Å. All panels were generated from the data set collected at NeCEN.

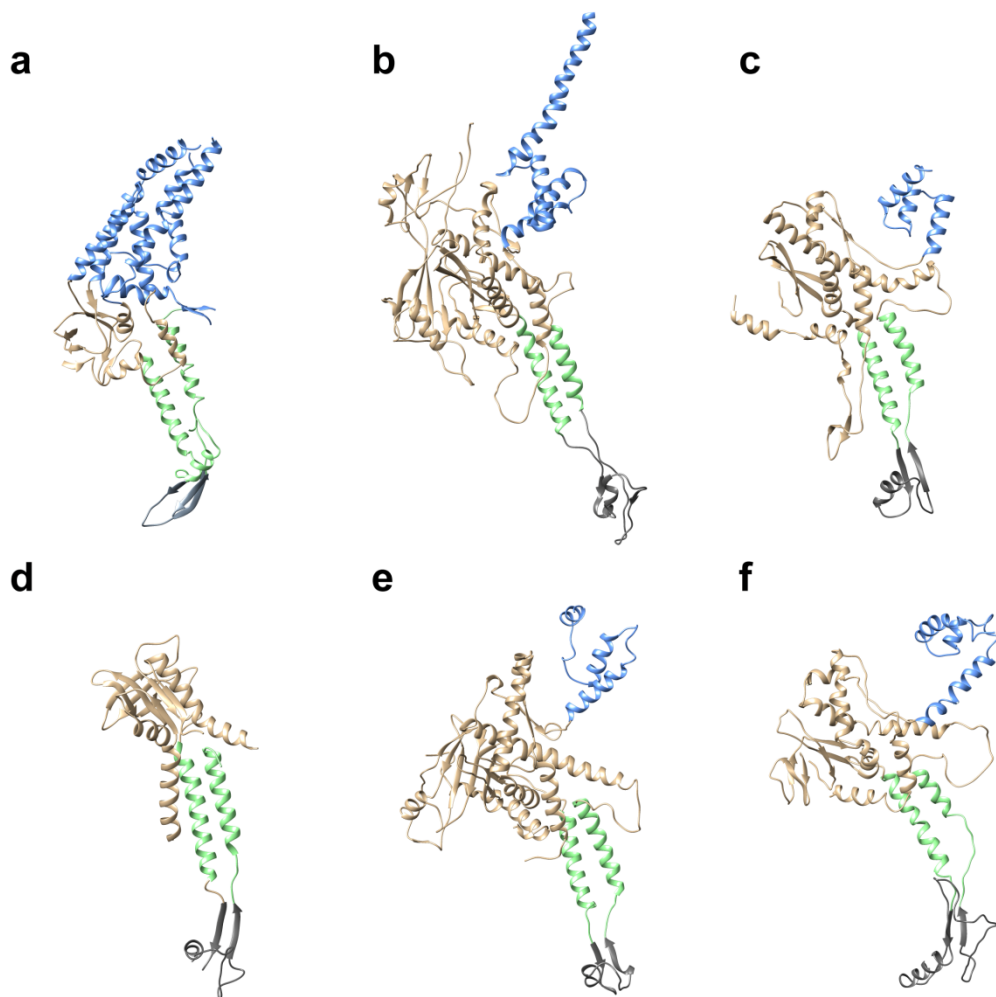

**Supplementary Fig. 2. Comparison of EBV portal with bacteriophage portal proteins.** Portal proteins in monomeric display with the wing, crown, stem and clip domains colored in sand, blue, light green and gray, respectively. **a.** EBV portal protein. **b.** gp1 P22 portal protein (3LJ5). **c.** gp6 SPP1 portal protein (2JES). **d.** gp10 φ29 portal protein (1H5W). **e.** gp8 T7 portal protein (6QX5). **f.** gp20 T4 portal protein (3JA7).

**Supplementary Table 1. Cryo-EM data collection, refinement and validation statistics.**

|                                                     | His-Z-pBBRF1 NeCEN<br>EMD-10010<br>PDB 6RVR | His-Z-pBBRF1 DLS<br>EMD-10011<br>PDB 6RVS |
|-----------------------------------------------------|---------------------------------------------|-------------------------------------------|
| <b>Data collection and processing</b>               |                                             |                                           |
| Nominal magnification                               | 130,000                                     | 130,000                                   |
| Voltage (kV)                                        | 300 kV                                      | 300 kV                                    |
| Electron exposure (e <sup>-</sup> /Å <sup>2</sup> ) | 40                                          | 40                                        |
| Defocus range (μm)                                  | - 1.0 to - 3.0                              | - 1.0 to - 3.0                            |
| Pixel size (Å/pix)                                  | 1.10                                        | 1.06                                      |
| Symmetry imposed                                    | C12                                         | C12                                       |
| Initial particle images (no.)                       | 404,914                                     | 250,788                                   |
| Final particle images (no.)                         | 73,395                                      | 35,063                                    |
| Map resolution (Å)                                  | 0.143                                       | 0.143                                     |
| FSC threshold                                       | 3.5 Å                                       | 3.6 Å                                     |
| Map resolution range                                | 3.5 to 5 Å                                  | 3.6 to 5 Å                                |
| <b>Refinement</b>                                   |                                             |                                           |
| Initial model used                                  | None ( <i>ab-initio</i> )                   | 3.46 Å resolution<br>model                |
| Map sharpening <i>B</i> factor (Å <sup>2</sup> )    | -189.91                                     | -165.00                                   |
| Model composition                                   |                                             |                                           |
| Non-hydrogen atoms                                  | 37668                                       | 38340                                     |
| Protein residues                                    | 4680                                        | 4764                                      |
| <i>B</i> factors (Å <sup>2</sup> )                  |                                             |                                           |
| Protein                                             | 28.20                                       | 81.18                                     |
| R.m.s. deviations                                   |                                             |                                           |
| Bond lengths (Å)                                    | 0.01                                        | 0.01                                      |
| Bond angles (°)                                     | 1.137                                       | 0.971                                     |
| Validation                                          |                                             |                                           |
| MolProbity score                                    | 2.34                                        | 1.76                                      |
| Clashscore                                          | 9.44                                        | 4.62                                      |
| Poor rotamers (%)                                   | 2.87                                        | 0.82                                      |
| Ramachandran plot                                   |                                             |                                           |
| Favored (%)                                         | 91.71                                       | 91.00                                     |
| Outliers (%)                                        | 0.26                                        | 0.51                                      |
